# Supplementary figures and images for: Asp120Asn mutation impairs the catalytic activity of NDM-1 metallo-β-lactamase: experimental and computational study
Source: Royal Society of Chemistry journal article supplement (doi:10.1039/c3cp55069a), 2014-01-01

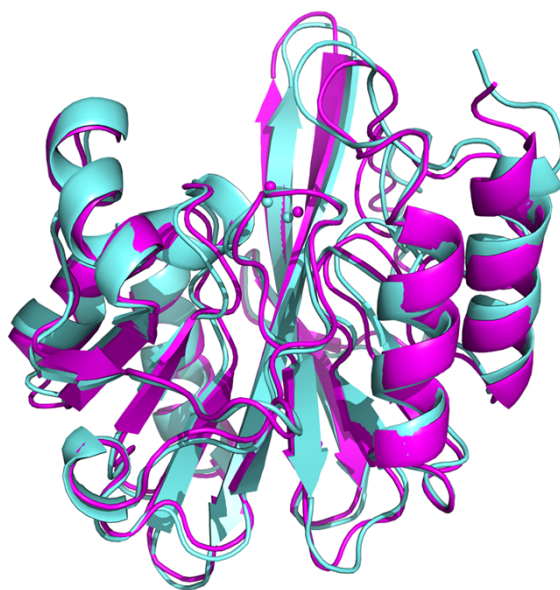

Fig. 1 The structures of wild-type NDM-1 (cyan) and D120N mutant (magenta).

Supplement: c3cp55069a1.pdf [file c3cp55069a1.pdf]
